# Supplementary material for: Ultrathin oxysulfide semiconductors from liquid metal: a wet chemical approach
Source: Royal Society of Chemistry journal article supplement (doi:10.1039/d1tc01937f), 2021-01-01
Supplement: d1tc01937f1.pdf [file d1tc01937f1.pdf]

## Supplementary Information

### Ultrathin oxysulfide semiconductors from liquid metal: a wet chemical approach

Chung Kim Nguyen,<sup>a</sup> Mei Xian Low,<sup>a</sup> Ali Zavabeti,<sup>b,c</sup> Azmira Jannat,<sup>a</sup> Billy J Murdoch,<sup>d</sup> Enrico Della Gaspera,<sup>b</sup> Rebecca Orrell-Trigg,<sup>b</sup> Sumeet Walia,<sup>a</sup> Aaron Elbourne,<sup>b</sup> Vi Khanh Truong,<sup>b</sup> Chris F McConville,<sup>b,e</sup> Nitu Syed,\*<sup>a</sup> Torben Daeneke\*<sup>a</sup>

<sup>a</sup> School of Engineering, RMIT University, Melbourne, VIC 3001, Australia

<sup>b</sup> School of Science, RMIT University, Melbourne, VIC 3001, Australia

<sup>c</sup> Department of Chemical Engineering, The University of Melbourne, Parkville, VIC 3010, Australia

<sup>d</sup> RMIT Microscopy and Microanalysis Facility, College of Science, Engineering & Health, RMIT University, Melbourne, Victoria 3001, Australia

<sup>e</sup> Institute for Frontier Materials, Deakin University, Waurn Ponds, Geelong, VIC 3216, Australia

Email: nitu.syed@rmit.edu.au, torben.daeneke@rmit.edu.au

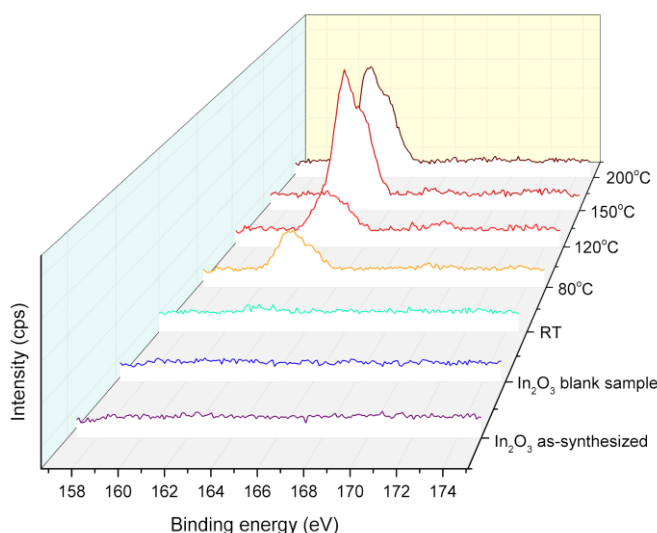

**Figure S1.** XPS spectra of S<sub>2p</sub> taken from samples treated at different temperatures in 5 hours. No signal was detected in the S<sub>2p</sub> regions of In<sub>2</sub>O<sub>3</sub> as-synthesized, blank sample, and the sample treated at room temperature. The S<sub>2p</sub> peaks of S<sup>2-</sup> are located at ~162 eV.<sup>1</sup>

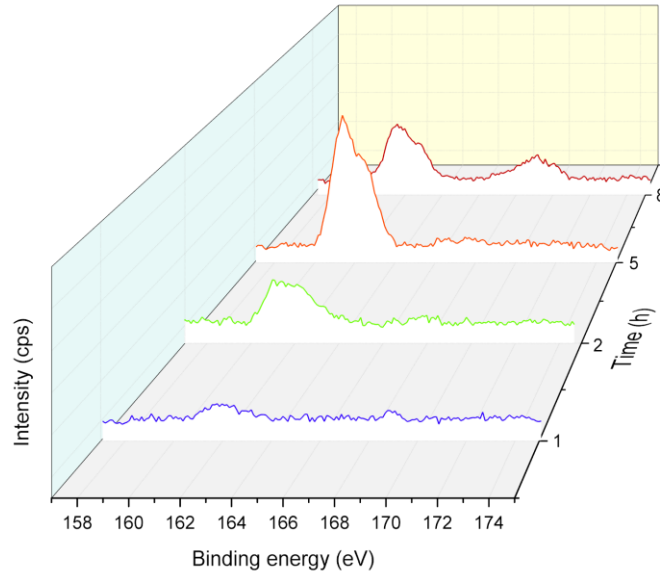

**Figure S2.** XPS spectra of  $S2p$  taken from samples treated at  $150^{\circ}\text{C}$  after different reaction times. The  $S2p$  peaks of  $\text{S}^{2-}$  are located at  $\sim 162$  eV, while the broaden peak at  $169.1$  eV detected in the sample after 8 hours is associated with sulfite/sulfate compounds ( $\text{SO}_4^{2-}$ ).<sup>1, 2</sup>

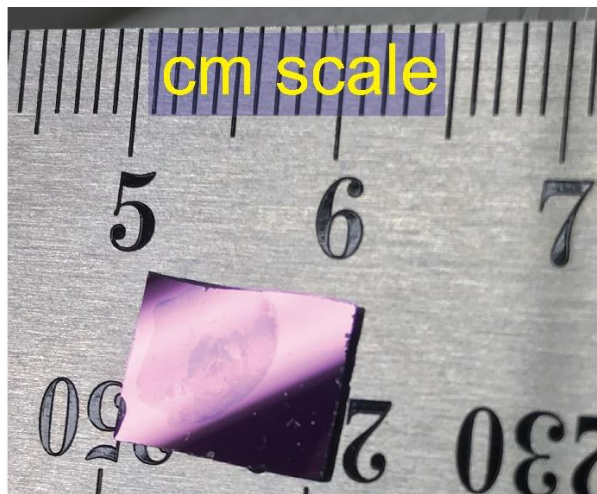

**Figure S3.** A representative  $2\text{D In}_2\text{O}_{3-x}\text{S}_x$  sheet printed on a  $\text{SiO}_2/\text{Si}$  substrate, approaching centimetre scale. It can be observed that the 2D sheet covers a homogeneous area of several millimetres with some inevitable folded regions at the edge and where the molten droplet was placed.

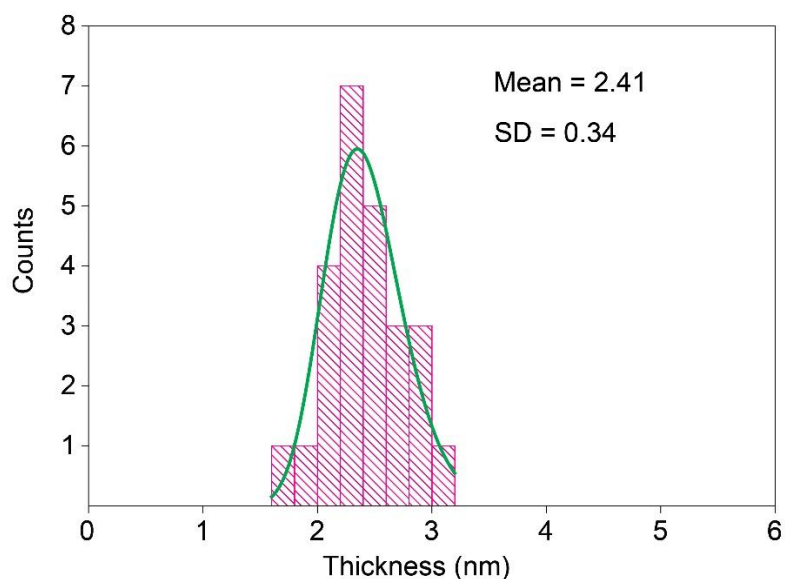

**Figure S4.** Statistical distribution of 2D  $\text{In}_2\text{O}_{3-x}\text{S}_x$  sheets thickness. The mean and standard deviation (SD) were found to be 2.41 nm and 0.34 nm, respectively. The difference between measurements is due to AFM tip-surface interactions, noises from environment, and substrate effects.<sup>3</sup>

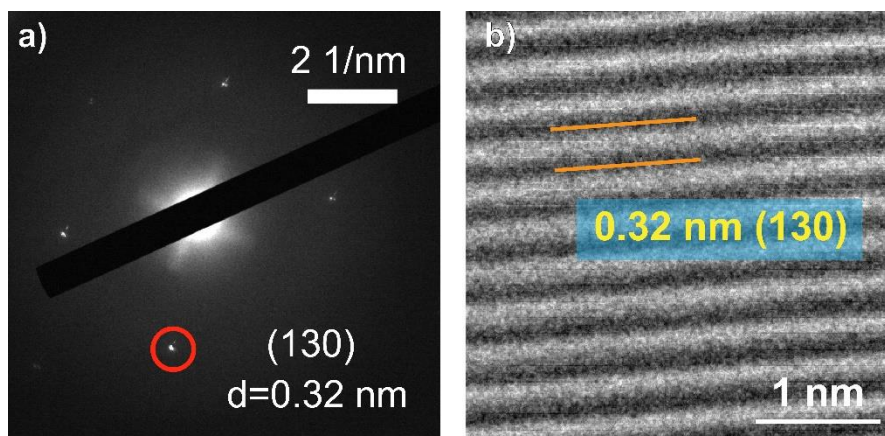

**Figure S5.** SAED pattern and HRTEM image of 2D  $\text{In}_2\text{O}_3$  directly exfoliated from molten indium metal. The diffraction spot in red circle and a lattice spacing of 0.32 nm can be indexed to (130) plane of *c*- $\text{In}_2\text{O}_3$ .<sup>4</sup> The crystal structure of cubic 2D  $\text{In}_2\text{O}_3$  derived from liquid metal has been reported in the previous study.<sup>5</sup>

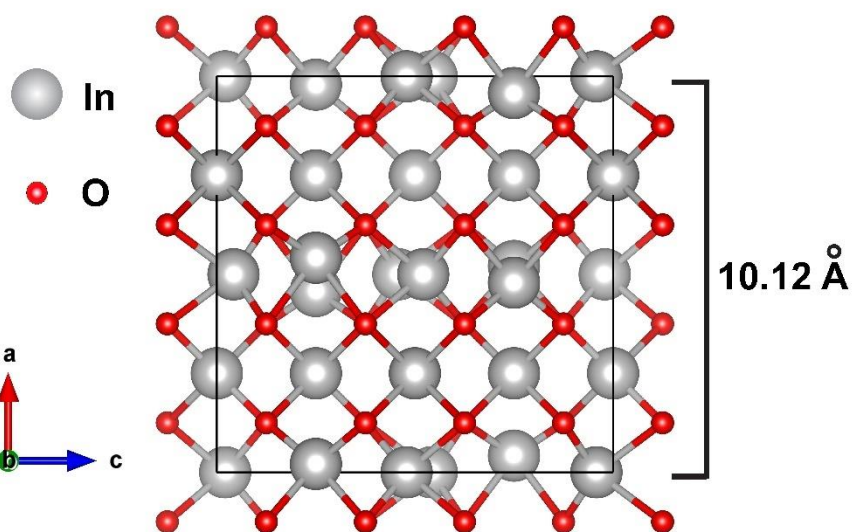

**Figure S6.** Crystal structure of  $c$ - $\text{In}_2\text{O}_3$  with the unit cell thickness of  $10.12 \text{ \AA}$ .<sup>4</sup>

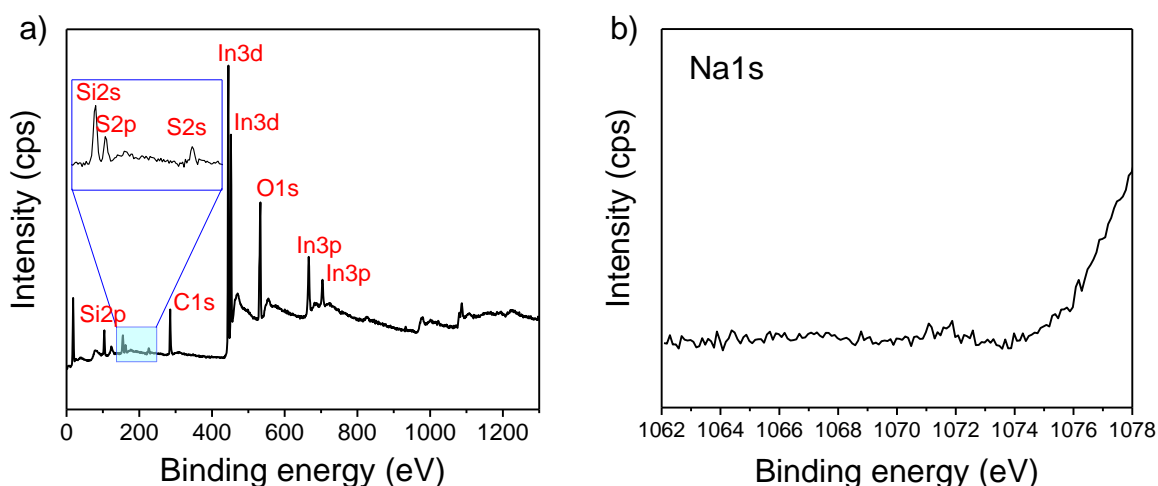

**Figure S7.** (a) XPS survey spectrum of 2D  $\text{In}_2\text{O}_{3-x}\text{S}_x$  nanosheets.  $\text{Si}2p$  and  $\text{Si}2s$  peaks arising from the silicon substrate have been detected at  $103.2 \text{ eV}$  and  $155.5 \text{ eV}$  respectively. (b) High resolution XPS spectrum of  $\text{Na } 1s$  for 2D  $\text{In}_2\text{O}_{3-x}\text{S}_x$  with no peaks being detected, indicating the absence of surface adsorbed  $\text{Na}_2\text{S}$ .

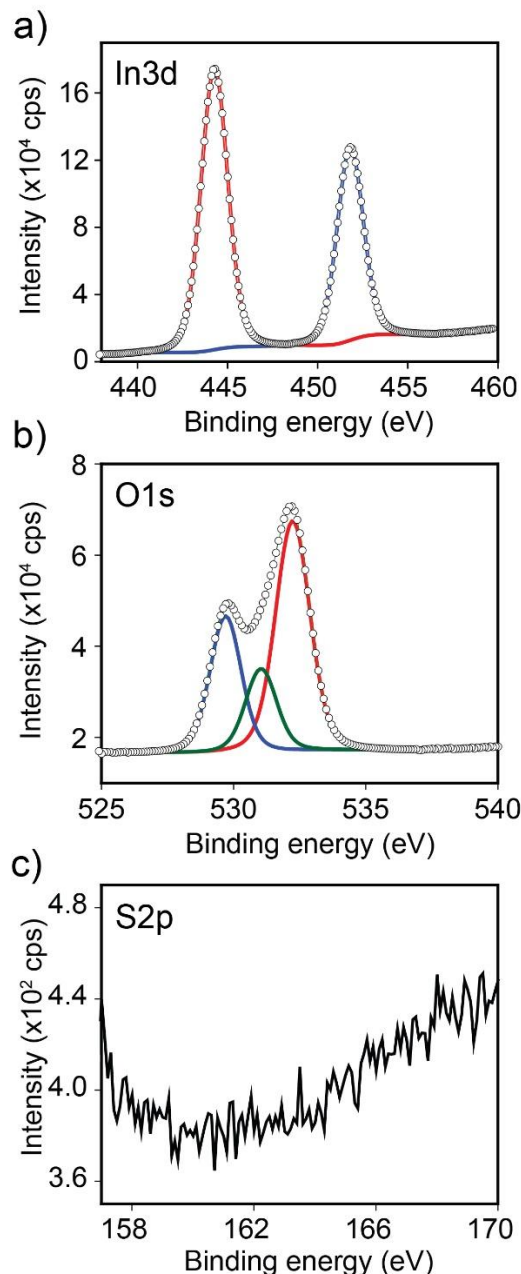

**Figure S8.** XPS spectra of 2D  $\text{In}_2\text{O}_3$  nanosheets. (a) XPS scanning for In 3d: the doublet signal at 444.3 eV and 451.77 eV is associated with In  $3d_{5/2}$  and In  $3d_{3/2}$ , respectively, no signals of indium metal have been recorded. (b) XPS scanning for O 1s: the dominant peak at 532.3 eV is related to Si-O-Si bonds in the substrate. The peak at 529.7 eV is attributed to  $\text{O}^{2-}$  ions in indium oxide lattice. The peak at 531.2 eV may be assigned to C=O bonds originating from surface contamination as well as oxygen atoms near defect sites.<sup>6-11</sup> (c) No peaks were detected in the S 2p region.

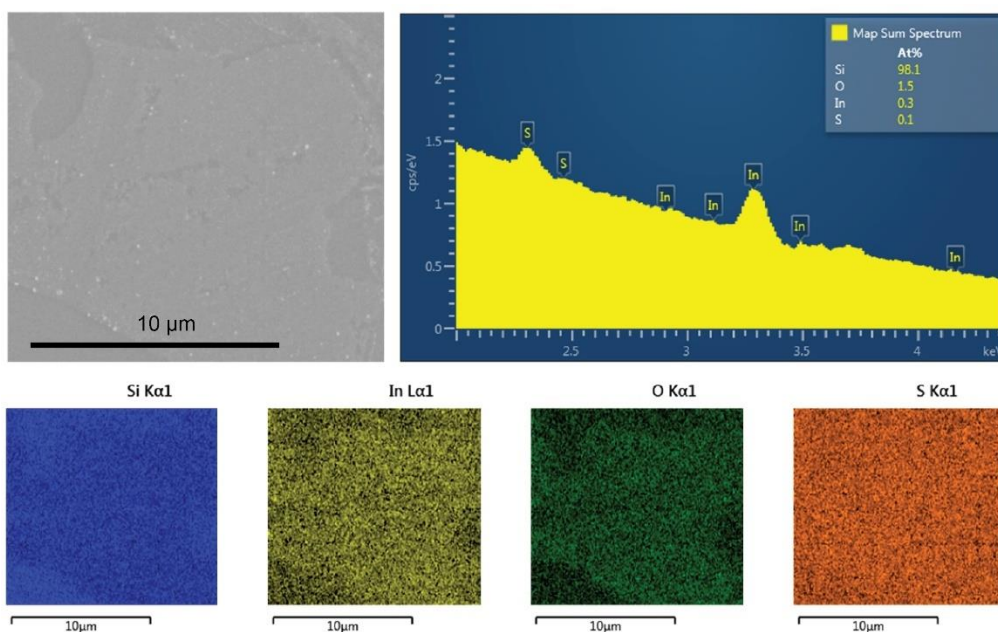

**Figure S9.** SEM-EDX spectrum of a 2D  $\text{In}_2\text{O}_{3-x}\text{S}_x$  nanosheet prepared on 300 nm  $\text{SiO}_2/\text{Si}$  wafer with corresponding maps for the elements Si, In, O, and S. The analysis was conducted at a folded edge region that was thicker and hence provided better signal. The map sum spectrum reveals a In:S ratio of 3:1, with the signal being close to the detection limit. The excess oxygen is due to surface  $\text{SiO}_2$  from the Si substrate. Because of the limitations of SEM-EDX, XPS elemental analysis is better suited and should be referred to when determining the composition of the synthesised nanosheets.

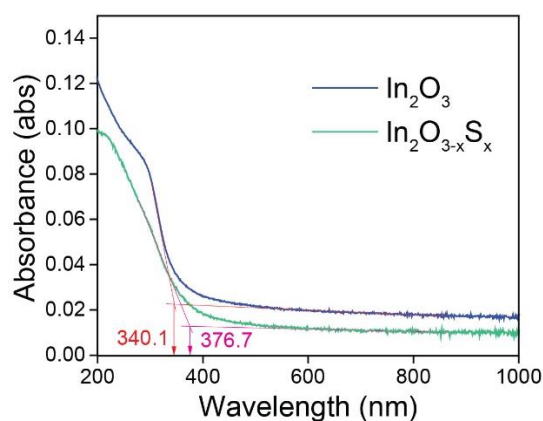

**Figure S10.** UV-vis spectra of 2D  $\text{In}_2\text{O}_3$  and 2D  $\text{In}_2\text{O}_{3-x}\text{S}_x$  ( $x=0.41$ ) indicates the shift in light absorption from 340.1 nm to 376.7 nm.

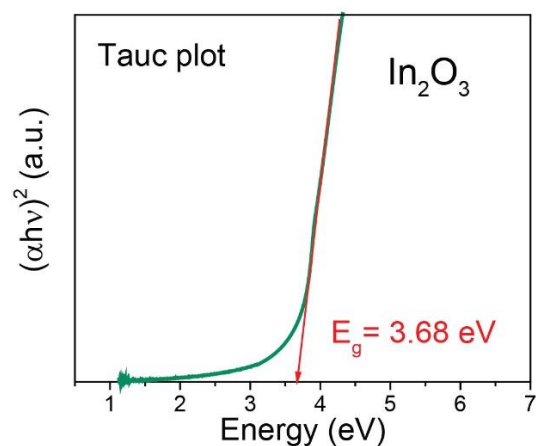

**Figure S11.** UV-vis Tauc plot of 2D  $\text{In}_2\text{O}_3$  sample reveals a direct bandgap of 3.68 eV.

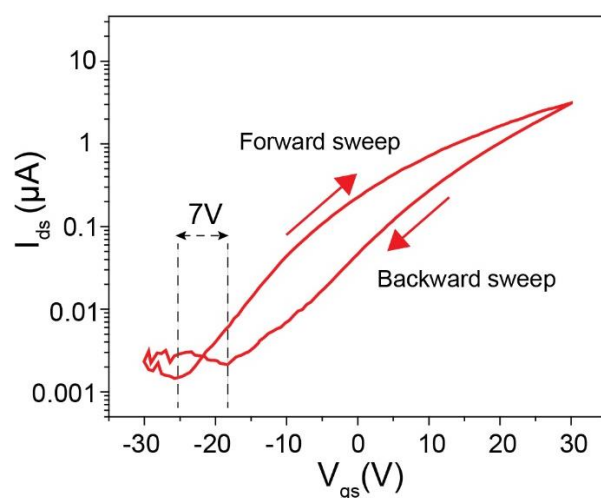

**Figure S12.** The transfer ( $I_{ds}$ - $V_{gs}$ ) curve with 1V source drain bias ( $V_{ds}$ ) shown in a semi-logarithmic scale. The dashed black lines indicate the change in the position of the charge neutrality point. Red arrows indicate the back-gate sweep direction. The hysteresis can be assigned to the trapping and de-trapping of charge carriers by adsorbed water molecules or by trap states on the dielectric substrate.<sup>12, 13</sup>

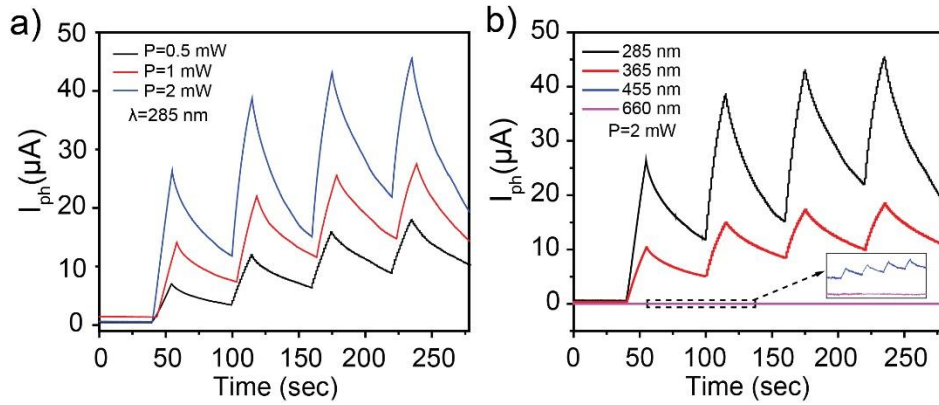

**Figure S13.** The photocurrent response of 2D  $\text{In}_2\text{O}_{3-x}\text{S}_x$  based device as a function of time under (a) different applied powers of the incident light and (b) different wavelengths. The  $V_{ds}$  was set at 0.5 V.

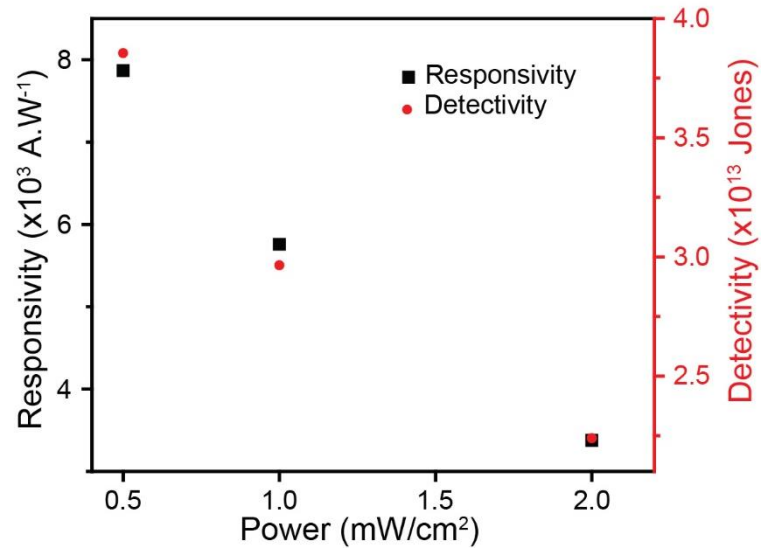

**Figure S14.** Responsivity and detectivity values of 2D  $\text{In}_2\text{O}_{3-x}\text{S}_x$  based device at different power intensities, with the wavelength of 285 nm and 0.5 V bias voltage.



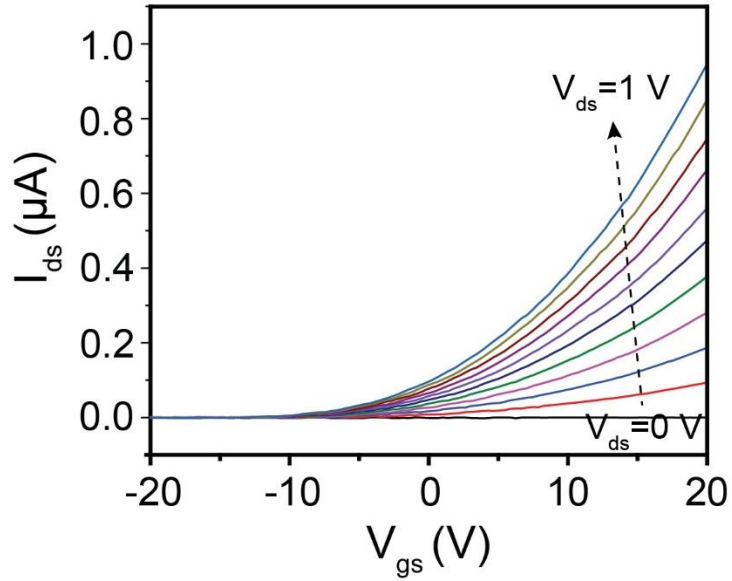

**Figure S15.** Transfer characteristic  $I_{ds}$ - $V_{gs}$  of 2D  $\text{In}_2\text{O}_3$  based device with  $V_{ds}$  being varied from 0 to 1 V.

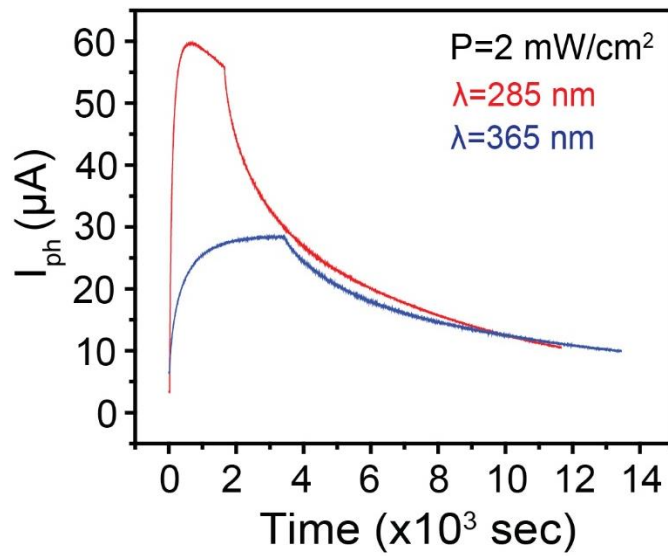

**Figure S16.** The photocurrent response of 2D  $\text{In}_2\text{O}_3$  based photodetector under 285 nm and 365 nm UV exposure at  $P = 2 \text{ mW cm}^{-2}$  and  $V_{ds} = 0.5 \text{ V}$ . The device is more sensitive to shorter wavelengths and features a persistent photocurrent for several hours.

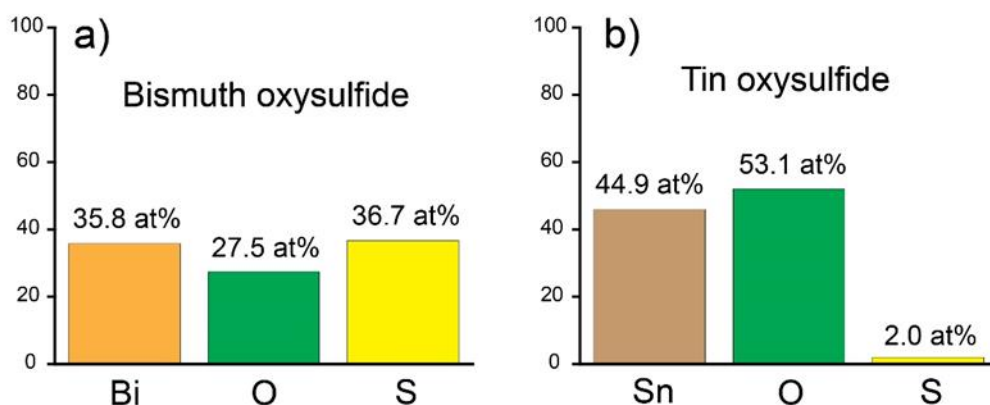

**Figure S17.** Elemental composition derived from XPS results of (a) 2D bismuth oxysulfide and (b) 2D tin oxysulfide.

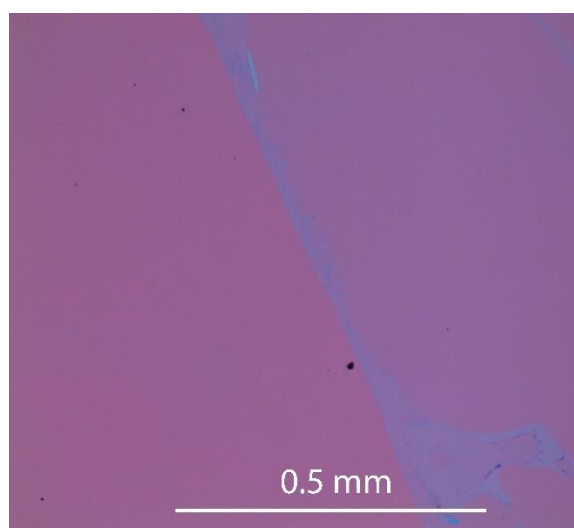

**Figure S18.** Optical image of an as-grown 2D In<sub>2</sub>O<sub>3</sub> nanosheet on silicon substrate with a folded region being observed at the edge of the 2D sheet.

**Table S1.** Screening the reaction parameters for the transformation of 2D In<sub>2</sub>O<sub>3</sub> into 2D In<sub>2</sub>O<sub>3-x</sub>S<sub>x</sub> (calculated from XPS data).

| Sample                                              | Temp. (°C) | Time (h) | S content (At%) | x         |
|-----------------------------------------------------|------------|----------|-----------------|-----------|
| In <sub>2</sub> O <sub>3</sub> as-synthesized *     | -          | -        | 0               | 0         |
| In <sub>2</sub> O <sub>3</sub> blank sample **      | 150        | 5        | 0               | 0         |
| In <sub>2</sub> O <sub>3-x</sub> S <sub>x</sub>     | RT         | 5        | <1              | -         |
| In <sub>2</sub> O <sub>3-x</sub> S <sub>x</sub>     | 80         | 5        | 4.2             | 0.21      |
| In <sub>2</sub> O <sub>3-x</sub> S <sub>x</sub>     | 120        | 5        | 4.6             | 0.23      |
| In <sub>2</sub> O <sub>3-x</sub> S <sub>x</sub> *** | 150        | 5        | 8.3±0.5         | 0.41±0.02 |
| In <sub>2</sub> O <sub>3-x</sub> S <sub>x</sub>     | 200        | 5        | 7.8             | 0.39      |
| In <sub>2</sub> O <sub>3-x</sub> S <sub>x</sub>     | 150        | 1        | <1              | -         |
| In <sub>2</sub> O <sub>3-x</sub> S <sub>x</sub>     | 150        | 2        | 1.8             | 0.09      |
| In <sub>2</sub> O <sub>3-x</sub> S <sub>x</sub>     | 150        | 8        | 6.4             | 0.32      |

\* 2D In<sub>2</sub>O<sub>3</sub> was analysed after squeeze printing process

\*\* 2D In<sub>2</sub>O<sub>3</sub> was treated at optimized conditions, but without sulfur sources

\*\*\* Experiments have been repeated 4 times for standard error calculation

Note: x is calculated from the relation  $x=2/(\text{In:S ratio})$  with In:S ratio being obtained from XPS data of 2D In<sub>2</sub>O<sub>3-x</sub>S<sub>x</sub>. Sulfur content is calculated from the relation %S=100x/5

**Table S2.** Comparison of FETs based on 2D In<sub>2</sub>O<sub>3-x</sub>S<sub>x</sub> nanosheets with some reported 2D oxides and chalcogenides over the past few years.

| Materials                                       | Thickness (nm) | Method                                   | Mobility (cm <sup>2</sup> V <sup>-1</sup> s <sup>-1</sup> ) | $I_{on}/I_{off}$    | Ref.      |
|-------------------------------------------------|----------------|------------------------------------------|-------------------------------------------------------------|---------------------|-----------|
| In <sub>2</sub> O <sub>3-x</sub> S <sub>x</sub> | 2.4            | vdW Exfoliation and wet chemical process | 44 *<br>20.4±6.3 **                                         | 0.6×10 <sup>2</sup> | This work |
| In <sub>2</sub> O <sub>3</sub>                  | 2.0            | vdW Exfoliation                          | 5.5±1.5 **                                                  | 4×10 <sup>2</sup>   | This work |
| In <sub>2</sub> O <sub>3</sub>                  | 1.5            | vdW Exfoliation                          | 4                                                           | 10 <sup>5</sup>     | 14        |
| In <sub>2</sub> O <sub>3</sub>                  | 12-20          | Inkjet-printing                          | 3.98                                                        | 10 <sup>8</sup>     | 15        |
| SnO                                             | 0.4            | vdW Exfoliation                          | 0.7                                                         | 20                  | 16        |
| SnO <sub>2</sub>                                | 50             | Solution process and annealing           | 0.23                                                        | 10 <sup>6</sup>     | 17        |
| ZnO                                             | 5              | ALD                                      | 2.8                                                         | 10 <sup>5</sup>     | 18        |
| IGZO                                            | 10             | Solution process and annealing           | 9.1                                                         | 10 <sup>6</sup>     | 19        |
| In <sub>2</sub> S <sub>3</sub>                  | 3.7            | vdW Exfoliation and CVD                  | 56                                                          | 10 <sup>4</sup>     | 1         |
| InSe                                            | 12             | Mechanical exfoliation                   | 0.1                                                         | 10 <sup>4</sup>     | 20        |
| InSe                                            | 41             | Solvent exfoliation                      | 19                                                          | 10 <sup>6</sup>     | 21        |
| α-Ga <sub>2</sub> S <sub>3</sub>                | 2              | vdW Exfoliation and CVD                  | 3.5                                                         | 10 <sup>2</sup>     | 22        |
| γ-Ga <sub>2</sub> S <sub>3</sub>                | 9              | CVD                                      | 1.1                                                         | 10 <sup>5</sup>     | 23        |
| GaS                                             | 1.5            | vdW Exfoliation and CVD                  | 0.2                                                         | 150                 | 24        |
| GaSe                                            | 1.1            | Mechanical exfoliation                   | 0.6                                                         | 10 <sup>5</sup>     | 25        |
| MoS <sub>2</sub>                                | 3              | CVD                                      | 12.24                                                       | 10 <sup>6</sup>     | 26        |
| MoS <sub>2</sub>                                | 0.8            | CVD                                      | 17                                                          | 10 <sup>3</sup>     | 27        |
| MoSe <sub>2</sub>                               | 3-80           | Mechanical exfoliation                   | 50                                                          | 10 <sup>6</sup>     | 28        |
| MoTe <sub>2</sub>                               | 1.6            | Mechanical exfoliation                   | 10                                                          | 10 <sup>6</sup>     | 29        |
| WS <sub>2</sub>                                 | 0.7            | CVD                                      | 0.91                                                        | 10 <sup>6</sup>     | 30        |

|                                      |
|--------------------------------------|
| * Highest value                      |
| ** Average value with standard error |

**Table S3.** Comparison of 2D  $\text{In}_2\text{O}_{3-x}\text{S}_x$  nanosheets with other recently reported 2D nanosheets and commercial materials for photodetector performance. NM: not mentioned.

| Materials                                         | Wavelength (nm) | Thickness (nm) | R ( $\text{A W}^{-1}$ ) | D* (Jones)            | EQE (%)            | Response time (ms)                                                       | Ref.      |
|---------------------------------------------------|-----------------|----------------|-------------------------|-----------------------|--------------------|--------------------------------------------------------------------------|-----------|
| $\text{In}_2\text{O}_{3-x}\text{S}_x$             | 285             | 2.4            | $3.4 \times 10^3$       | $2.18 \times 10^{13}$ | $1.47 \times 10^6$ | $t_{\text{rise}} = 42 \times 10^3$<br>$t_{\text{fall}} = 87 \times 10^3$ | This work |
| SnO-In <sub>2</sub> O <sub>3</sub>                | 280             | 5.5            | $10^3$                  | $5 \times 10^9$       | NM                 | $\leq 1$                                                                 | 5         |
| Bi <sub>2</sub> O <sub>3</sub>                    | 365             | 0.75           | $4 \times 10^2$         | $1.1 \times 10^{13}$  | NM                 | 0.07                                                                     | 31        |
| Graphene- $\beta$ -Ga <sub>2</sub> O <sub>3</sub> | 254             | 2              | 1.48                    | $2.24 \times 10^{12}$ | $7.27 \times 10^2$ | $3.1 \times 10^5$                                                        | 32        |
| $\gamma$ -Ga <sub>2</sub> S <sub>3</sub>          | 350             | 9              | 61.3                    | $1.52 \times 10^{10}$ | $2.17 \times 10^4$ | 10-15                                                                    | 23        |
| GaS                                               | 254             | 2.3            | 4.2                     | $10^{13}$             | $2 \times 10^3$    | $< 30$                                                                   | 33        |
| WS <sub>2</sub>                                   | 365             | 25.2           | 53.3                    | $1.22 \times 10^{11}$ | NM                 | NM                                                                       | 34        |
| MoS <sub>2</sub>                                  | 405             | 1.3            | $6.3 \times 10^{-5}$    | $4.2 \times 10^8$     | NM                 | 20                                                                       | 35        |
| InSe                                              | 254             | 30             | $5.6 \times 10^4$       | $2 \times 10^{13}$    | NM                 | 5                                                                        | 36        |
| SnSe                                              | 370             | 9              | 5.5                     | $6 \times 10^{10}$    | $1.83 \times 10^3$ | NM                                                                       | 37        |
| In <sub>2</sub> Se <sub>3</sub>                   | 300             | 3.9            | $3.9 \times 10^2$       | $2.26 \times 10^{12}$ | $16.3 \times 10^4$ | 18                                                                       | 38        |
| Commercial Si                                     | 400-1100        | NM             | 0.5                     | $3 \times 10^{12}$    | NM                 | $10^{-6}$                                                                | 39        |
| Commercial GaP                                    | 150-550         | NM             | 0.1                     | $2 \times 10^{13}$    | NM                 | $1.1 \times 10^{-4}$                                                     | 39        |

## References

- Jannat, A.; Yao, Q.; Zavabeti, A.; Syed, N.; Zhang, B. Y.; Ahmed, T.; Kuriakose, S.; Mohiuddin, M.; Pillai, N.; Haque, F.; Ren, G.; Zhu, D. M.; Cheng, N.; Du, Y.; Tawfik, S. A.; Spencer, M. J. S.; Murdoch, B. J.; Wang, L.; McConville, C. F.; Walia, S.; Daeneke, T.; Zhu, L.; Ou, J. Z., Ordered-vacancy-enabled indium sulphide printed in wafer-scale with enhanced electron mobility. *Mater. Horiz.* **2020**, 7 (3), 827-834.
- Bugot, C.; Bouttemy, M.; Schneider, N.; Etcheberry, A.; Lincot, D.; Donsanti, F., New insights on the chemistry of plasma-enhanced atomic layer deposition of indium oxysulfide thin films and their use as buffer layers in Cu (In, Ga) Se<sub>2</sub> thin film solar cell. *J. Vac. Sci. Technol., A* **2018**, 36 (6), 061510.
- Marinello, F.; Carmignato, S.; Voltan, A.; Savio, E.; De Chiffre, L., Error Sources in Atomic Force Microscopy for Dimensional Measurements: Taxonomy and Modeling. *J. Manuf. Sci. Eng.* **2010**, 132 (3).
- Marezio, M., Refinement of the crystal structure of In<sub>2</sub>O<sub>3</sub> at two wavelengths. *Acta Crystallographica* **1966**, 20 (6), 723-728.
- Alsaif, M. M. Y. A.; Kuriakose, S.; Walia, S.; Syed, N.; Jannat, A.; Zhang, B. Y.; Haque, F.; Mohiuddin, M.; Alkathiri, T.; Pillai, N.; Daeneke, T.; Ou, J. Z.; Zavabeti, A., 2D SnO/In<sub>2</sub>O<sub>3</sub> van der Waals Heterostructure Photodetector Based on Printed Oxide Skin of Liquid Metals. *Advanced Materials Interfaces* **2019**, 6 (7), 1900007.

6. Beena, D.; Lethy, K. J.; Vinodkumar, R.; Mahadevan Pillai, V. P.; Ganesan, V.; Phase, D. M.; Sudheer, S. K., Effect of substrate temperature on structural, optical and electrical properties of pulsed laser ablated nanostructured indium oxide films. *Appl. Surf. Sci.* **2009**, *255* (20), 8334-8342.
7. Gan, J.; Lu, X.; Wu, J.; Xie, S.; Zhai, T.; Yu, M.; Zhang, Z.; Mao, Y.; Wang, S. C. I.; Shen, Y., Oxygen vacancies promoting photoelectrochemical performance of In<sub>2</sub>O<sub>3</sub> nanocubes. *Scientific reports* **2013**, *3* (1), 1-7.
8. Kim, J.; Ho, P.; Thomas, D.; Friend, R.; Cacialli, F.; Bao, G.-W.; Li, S., X-ray photoelectron spectroscopy of surface-treated indium-tin oxide thin films. *Chem. Phys. Lett.* **1999**, *315* (5-6), 307-312.
9. Donley, C.; Dunphy, D.; Paine, D.; Carter, C.; Nebesny, K.; Lee, P.; Alloway, D.; Armstrong, N. R., Characterization of Indium– Tin oxide interfaces using X-ray photoelectron spectroscopy and redox processes of a chemisorbed probe molecule: effect of surface pretreatment conditions. *Langmuir* **2002**, *18* (2), 450-457.
10. Fan, J. C.; Goodenough, J. B., X-ray photoemission spectroscopy studies of Sn-doped indium-oxide films. *J. Appl. Phys.* **1977**, *48* (8), 3524-3531.
11. Schneuwly, A.; Gröning, P.; Schlapbach, L.; Jaecklin, V. P., Influence of surface contamination on metal/metal bond contact quality. *J. Electron. Mater.* **1998**, *27* (8), 990-997.
12. Shu, J.; Wu, G.; Guo, Y.; Liu, B.; Wei, X.; Chen, Q., The intrinsic origin of hysteresis in MoS<sub>2</sub> field effect transistors. *Nanoscale* **2016**, *8* (5), 3049-3056.
13. Kathalingam, A.; Senthilkumar, V.; Rhee, J.-K., Hysteresis I–V nature of mechanically exfoliated graphene FET. *J. Mater. Sci.: Mater. Electron.* **2014**, *25* (3), 1303-1308.
14. Jannat, A.; Syed, N.; Xu, K.; Rahman, M. A.; Talukder, M. M. M.; Messalea, K. A.; Mohiuddin, M.; Datta, R. S.; Khan, M. W.; Alkathiri, T.; Murdoch, B. J.; Reza, S. Z.; Li, J.; Daeneke, T.; Zavabeti, A.; Ou, J. Z., Printable Single-Unit-Cell-Thick Transparent Zinc-Doped Indium Oxides with Efficient Electron Transport Properties. *ACS Nano* **2021**.
15. Lee, J. S.; Kwack, Y.-J.; Choi, W.-S., Inkjet-Printed In<sub>2</sub>O<sub>3</sub> Thin-Film Transistor below 200 °C. *ACS Appl. Mater. Interfaces* **2013**, *5* (22), 11578-11583.
16. Daeneke, T.; Atkin, P.; Orrell-Trigg, R.; Zavabeti, A.; Ahmed, T.; Walia, S.; Liu, M.; Tachibana, Y.; Javaid, M.; Greentree, A. D.; Russo, S. P.; Kaner, R. B.; Kalantar-Zadeh, K., Wafer-Scale Synthesis of Semiconducting SnO Monolayers from Interfacial Oxide Layers of Metallic Liquid Tin. *ACS Nano* **2017**, *11* (11), 10974-10983.
17. D.M, P.; Mannam, R.; Rao, M. S. R.; DasGupta, N., Effect of annealing ambient on SnO<sub>2</sub> thin film transistors. *Appl. Surf. Sci.* **2017**, *418*, 414-417.
18. Yoon, M.; Park, J.; Tran, D. C.; Sung, M. M., Fermi-Level Engineering of Atomic Layer-Deposited Zinc Oxide Thin Films for a Vertically Stacked Inverter. *ACS Appl. Electron. Mater.* **2020**, *2* (2), 537-544.
19. Xu, W.; Hu, L.; Zhao, C.; Zhang, L.; Zhu, D.; Cao, P.; Liu, W.; Han, S.; Liu, X.; Jia, F.; Zeng, Y.; Lu, Y., Low temperature solution-processed IGZO thin-film transistors. *Appl. Surf. Sci.* **2018**, *455*, 554-560.
20. Tamalampudi, S. R.; Lu, Y.-Y.; U, R. K.; Sankar, R.; Liao, C.-D.; B, K. M.; Cheng, C.-H.; Chou, F. C.; Chen, Y.-T., High Performance and Bendable Few-Layered InSe Photodetectors with Broad Spectral Response. *Nano Lett.* **2014**, *14* (5), 2800-2806.
21. Kang, J.; Wells, S. A.; Sangwan, V. K.; Lam, D.; Liu, X.; Luxa, J.; Sofer, Z.; Hersam, M. C., Solution-Based Processing of Optoelectronically Active Indium Selenide. *Adv. Mater.* **2018**, *30* (38), 1802990.
22. Alsaif, M. M. Y. A.; Pillai, N.; Kuriakose, S.; Walia, S.; Jannat, A.; Xu, K.; Alkathiri, T.; Mohiuddin, M.; Daeneke, T.; Kalantar-Zadeh, K.; Ou, J. Z.; Zavabeti, A., Atomically Thin Ga<sub>2</sub>S<sub>3</sub> from Skin of Liquid Metals for Electrical, Optical, and Sensing Applications. *ACS Appl. Nano Mater.* **2019**, *2* (7), 4665-4672.

23. Zhou, N.; Gan, L.; Yang, R.; Wang, F.; Li, L.; Chen, Y.; Li, D.; Zhai, T., Nonlayered Two-Dimensional Defective Semiconductor  $\gamma$ -Ga<sub>2</sub>S<sub>3</sub> toward Broadband Photodetection. *ACS Nano* **2019**, *13* (6), 6297-6307.
24. Carey, B. J.; Ou, J. Z.; Clark, R. M.; Berean, K. J.; Zavabeti, A.; Chesman, A. S. R.; Russo, S. P.; Lau, D. W. M.; Xu, Z.-Q.; Bao, Q.; Kavehei, O.; Gibson, B. C.; Dickey, M. D.; Kaner, R. B.; Daeneke, T.; Kalantar-Zadeh, K., Wafer-scale two-dimensional semiconductors from printed oxide skin of liquid metals. *Nat. Commun.* **2017**, *8* (1), 14482.
25. Late, D. J.; Liu, B.; Luo, J.; Yan, A.; Matte, H. S. S. R.; Grayson, M.; Rao, C. N. R.; Dravid, V. P., GaS and GaSe Ultrathin Layer Transistors. *Adv. Mater.* **2012**, *24* (26), 3549-3554.
26. Park, J.; Choudhary, N.; Smith, J.; Lee, G.; Kim, M.; Choi, W., Thickness modulated MoS<sub>2</sub> grown by chemical vapor deposition for transparent and flexible electronic devices. *Appl. Phys. Lett.* **2015**, *106* (1), 012104.
27. Yu, L.; Lee, Y.-H.; Ling, X.; Santos, E. J. G.; Shin, Y. C.; Lin, Y.; Dubey, M.; Kaxiras, E.; Kong, J.; Wang, H.; Palacios, T., Graphene/MoS<sub>2</sub> Hybrid Technology for Large-Scale Two-Dimensional Electronics. *Nano Lett.* **2014**, *14* (6), 3055-3063.
28. Larentis, S.; Fallahazad, B.; Tutuc, E., Field-effect transistors and intrinsic mobility in ultra-thin MoSe<sub>2</sub> layers. *Appl. Phys. Lett.* **2012**, *101* (22), 223104.
29. Pradhan, N. R.; Rhodes, D.; Feng, S.; Xin, Y.; Memaran, S.; Moon, B.-H.; Terrones, H.; Terrones, M.; Balicas, L., Field-Effect Transistors Based on Few-Layered  $\alpha$ -MoTe<sub>2</sub>. *ACS Nano* **2014**, *8* (6), 5911-5920.
30. Lan, C.; Li, C.; Yin, Y.; Liu, Y., Large-area synthesis of monolayer WS<sub>2</sub> and its ambient-sensitive photo-detecting performance. *Nanoscale* **2015**, *7* (14), 5974-5980.
31. Messalea, K. A.; Carey, B. J.; Jannat, A.; Syed, N.; Mohiuddin, M.; Zhang, B. Y.; Zavabeti, A.; Ahmed, T.; Mahmood, N.; Della Gaspera, E.; Khoshmanesh, K.; Kalantar-Zadeh, K.; Daeneke, T., Bi<sub>2</sub>O<sub>3</sub> monolayers from elemental liquid bismuth. *Nanoscale* **2018**, *10* (33), 15615-15623.
32. Kong, W.-Y.; Wu, G.-A.; Wang, K.-Y.; Zhang, T.-F.; Zou, Y.-F.; Wang, D.-D.; Luo, L.-B., Graphene- $\beta$ -Ga<sub>2</sub>O<sub>3</sub> Heterojunction for Highly Sensitive Deep UV Photodetector Application. *Adv. Mater.* **2016**, *28* (48), 10725-10731.
33. Hu, P.; Wang, L.; Yoon, M.; Zhang, J.; Feng, W.; Wang, X.; Wen, Z.; Idrobo, J. C.; Miyamoto, Y.; Geoghegan, D. B.; Xiao, K., Highly Responsive Ultrathin GaS Nanosheet Photodetectors on Rigid and Flexible Substrates. *Nano Lett.* **2013**, *13* (4), 1649-1654.
34. Zeng, L.; Tao, L.; Tang, C.; Zhou, B.; Long, H.; Chai, Y.; Lau, S. P.; Tsang, Y. H., High-responsivity UV-Vis Photodetector Based on Transferable WS<sub>2</sub> Film Deposited by Magnetron Sputtering. *Sci. Rep* **2016**, *6* (1), 20343.
35. Lee, Y.; Yang, J.; Lee, D.; Kim, Y.-H.; Park, J.-H.; Kim, H.; Cho, J. H., Trap-induced photoresponse of solution-synthesized MoS<sub>2</sub>. *Nanoscale* **2016**, *8* (17), 9193-9200.
36. Feng, W.; Wu, J.-B.; Li, X.; Zheng, W.; Zhou, X.; Xiao, K.; Cao, W.; Yang, B.; Idrobo, J.-C.; Basile, L.; Tian, W.; Tan, P.; Hu, P., Ultrahigh photo-responsivity and detectivity in multilayer InSe nanosheets phototransistors with broadband response. *J. Mater. Chem. C* **2015**, *3* (27), 7022-7028.
37. Yao, J.; Zheng, Z.; Yang, G., All-Layered 2D Optoelectronics: A High-Performance UV-vis-NIR Broadband SnSe Photodetector with Bi<sub>2</sub>Te<sub>3</sub> Topological Insulator Electrodes. *Adv. Funct. Mater.* **2017**, *27* (33), 1701823.
38. Jacobs-Gedrim, R. B.; Shanmugam, M.; Jain, N.; Durcan, C. A.; Murphy, M. T.; Murray, T. M.; Matyi, R. J.; Moore, R. L.; Yu, B., Extraordinary Photoresponse in Two-Dimensional In<sub>2</sub>Se<sub>3</sub> Nanosheets. *ACS Nano* **2014**, *8* (1), 514-521.
39. Krishnamurthi, V.; Khan, H.; Ahmed, T.; Zavabeti, A.; Tawfik, S. A.; Jain, S. K.; Spencer, M. J. S.; Balendhran, S.; Crozier, K. B.; Li, Z.; Fu, L.; Mohiuddin, M.; Low, M. X.; Shabbir, B.; Boes, A.; Mitchell, A.; McConville, C. F.; Li, Y.; Kalantar-Zadeh, K.; Mahmood, N.; Walia, S., Liquid-Metal Synthesized Ultrathin SnS Layers for High-Performance Broadband Photodetectors. *Adv. Mater.* **2020**, *32* (45), 2004247.
